# Supplementary material
Source: ML conference proceedings conference paper supplement (https://openreview.net/forum?id=ByDy2mlkig)
Supplement: supplementary_material [file attachment]

## 487 A Appendix

### 488 A.1 Additional definition and proofs

489 Let us first recall the optimal transport problem associated with the minimization of  $\mathcal{L}_{\lambda,m}^{hKR}$ :

$$\inf_{f \in Lip_1(\Omega)} \mathcal{L}_{\lambda(m)}^{hKR} = \inf_{\pi \in \Pi_{\lambda}^p(\mu, \nu)} \int_{\Omega \times \Omega} |\mathbf{x} - \mathbf{z}| d\pi + \pi_{\mathbf{x}}(\Omega) + \pi_{\mathbf{z}}(\Omega) - 1 \quad (3)$$

490 Where  $\Pi_{\lambda}^p(\mu, \nu)$  is the set consisting of positive measures  $\pi \in \mathcal{M}_+(\Omega \times \Omega)$  which are absolutely  
 491 continuous with respect to the joint measure  $d\mu \times d\nu$  and  $\frac{d\pi_{\mathbf{x}}}{d\mu} \in [p, p(m + \lambda)]$ ,  $\frac{d\pi_{\mathbf{z}}}{d\nu} \in [1 - p, (1 -$   
 492  $p)(m + \lambda)]$ . We name  $\pi^*$  the optimal transport plan according to Eq.3 and  $f^*$  the associated  
 493 potential function.

**Proof of proposition 1:** According to [53], we have

$$||\nabla_x f^*(\mathbf{x})|| = 1$$

494 almost surely and

$$\mathbb{P}_{(\mathbf{x}, y) \sim \pi^*} (|f^*(\mathbf{x}) - f^*(y)| = ||\mathbf{x} - y||) = 1$$

Following the proof of proposition 1 in [26] and [3] we have :

Given  $\mathbf{x}_{\alpha} = \alpha * \mathbf{x} + (1 - \alpha)y$ ,  $0 \leq \alpha \leq 1$

$$\mathbb{P}_{(\mathbf{x}, y) \sim \pi^*} \left( \nabla_x f^*(\mathbf{x}_{\alpha}) = \frac{\mathbf{x}_{\alpha} - y}{||\mathbf{x}_{\alpha} - y||} \right) = 1.$$

So for  $\alpha = 1$  we have

$$\mathbb{P}_{(\mathbf{x}, y) \sim \pi^*} \left( \nabla_x f^*(\mathbf{x}) = \frac{\mathbf{x} - y}{||\mathbf{x} - y||} \right) = 1$$

and then

$$\mathbb{P}_{(\mathbf{x}, y) \sim \pi^*} (y = \mathbf{x} - \nabla_x f^*(\mathbf{x}) \cdot ||\mathbf{x} - y||) = 1$$

495 This prove the proposition 1 by choosing  $t = ||\mathbf{x} - y||$ . ■

496

497 **Proof of proposition 2:** Let  $\mu$  and  $\nu$  two distributions with disjoint support with minimal distance  $\epsilon$   
 498 and  $f^*$  an optimal solution minimizing the  $\mathcal{L}_{\lambda,m}^{hKR}$  with  $m < 2\epsilon$ . According to [53],  $f^*$  is 100%  
 499 accurate. Since the classification is based on the sign of  $f$  we have :  $\forall \mathbf{x} \in \mu, f^*(\mathbf{x}) \geq 0$  and  
 500  $\forall y \in \nu, f^*(y) \leq 0$ . Given  $\mathbf{x} \in \mu$  and  $y = tr_{\pi}(\mathbf{x}) = \mathbf{x} - t \nabla_x f^*(\mathbf{x})$  and  $y \in \nu$ . According to the  
 501 previous proposition we have :

$$\begin{aligned} |f^*(\mathbf{x}) - f^*(y)| &= ||\mathbf{x} - y|| \\ |f^*(\mathbf{x}) - f^*(y)| &= ||\mathbf{x} - (\mathbf{x} - t \nabla_x f^*(\mathbf{x}))|| \\ |f^*(\mathbf{x}) - f^*(y)| &= ||t \nabla_x f^*(\mathbf{x})|| \\ |f^*(\mathbf{x}) - f^*(y)| &= t \cdot ||\nabla_x f^*(\mathbf{x})|| & (t \geq 0) \\ |f^*(\mathbf{x}) - f^*(y)| &= t & (\nabla_x f^*(\mathbf{x}) = 1) \\ f^*(\mathbf{x}) - f^*(y) &= t & (f^*(\mathbf{x}) \geq 0, f^*(y) \leq 0) \\ f^*(y) &= f^*(\mathbf{x}) - t \end{aligned}$$

since  $f^*(y) \leq 0$  we obtain :

$$f^*(\mathbf{x}) \leq t$$

502 Since  $f^*$  is continuous,  $\exists t' > 0$  such that  $\mathbf{x}_{\delta} = \mathbf{x} - t' \nabla_x f^*(\mathbf{x})$  and  $f^*(\mathbf{x}_{\delta}) = 0$ . We have :

$$\begin{aligned} |f^*(\mathbf{x}) - f^*(\mathbf{x}_{\delta})| &\leq ||\mathbf{x} - \mathbf{x}_{\delta}|| \\ f^*(\mathbf{x}) &\leq ||\mathbf{x} - (\mathbf{x} - t' \nabla_x f^*(\mathbf{x}))|| \\ f^*(\mathbf{x}) &\leq t' \end{aligned}$$

503 and

$$\begin{aligned}
|f^*(\mathbf{x}_\delta) - f^*(y)| &\leq \|\mathbf{x}_\delta - y\| \\
-f^*(y) &\leq \|(\mathbf{x} - t'\nabla_x f^*(\mathbf{x})) - (\mathbf{x} - t\nabla_x f^*(\mathbf{x}))\| \\
-f^*(y) &\leq t - t' \\
-f^*(y) &\leq \|\mathbf{x} - y\| - t'
\end{aligned}
\tag*{) }$$

504 Then, if  $f^*(\mathbf{x}) < t'$  we have

$$\begin{aligned}
f^*(\mathbf{x}) - f^*(y) &< t' + \|\mathbf{x} - y\| - t' \\
f^*(\mathbf{x}) - f^*(y) &< \|\mathbf{x} - y\|
\end{aligned}$$

which is a contradiction so  $f^*(\mathbf{x}) = t'$  and

$$\mathbf{x}_\delta = \mathbf{x} - f^*(\mathbf{x})\nabla_x f^*(\mathbf{x})$$

505 ■



## A.2 Parameters and architectures

### A.2.1 Datasets

**FashionMNIST** has 50,000 images for training and 10,000 for test of size  $28 \times 28 \times 1$ , with 10 classes.

**CelebA** contains 162,770 training samples, 19,962 samples for test of size  $218 \times 178 \times 3$ . We have used a subset of 22 labels: *Attractive*, *Bald*, *Big\_Nose*, *Black\_Hair*, *Blond\_Hair*, *Blurry*, *Brown\_Hair*, *Eyeglasses*, *Gray\_Hair*, *Heavy\_Makeup*, *Male*, *Mouth\_Slightly\_Open*, *Mustache*, *Receding\_Hairline*, *Rosy\_Cheeks*, *Sideburns*, *Smiling*, *Wearing\_Earrings*, *Wearing\_Hat*, *Wearing\_Lipstick*, *Wearing\_Necktie*, *Young*.

Note that labels in CelebA are very unbalanced (see Table 2, with less than 5% samples for *Mustache* or *Wearing\_Hat* for instance). Thus we will use Sensibility and Specificity as metrics.

Table 2: CelebA label distribution: proportion of positive samples in training set (testing set) [bold: very unbalanced labels]

|                        |                            |                         |                          |                         |
|------------------------|----------------------------|-------------------------|--------------------------|-------------------------|
| <i>Attractive</i>      | <i>Bald</i>                | <i>Big_Nose</i>         | <i>Black_Hair</i>        | <i>Blond_Hair</i>       |
| 0.51 (0.50)            | <b>0.02 (0.02)</b>         | <b>0.24 (0.21)</b>      | <b>0.24 (0.27)</b>       | <b>0.15 (0.13)</b>      |
| <i>Blurry</i>          | <i>Brown_Hair</i>          | <i>Eyeglasses</i>       | <i>Gray_Hair</i>         | <i>Heavy_Makeup</i>     |
| <b>0.05 (0.05)</b>     | <b>0.20 (0.18)</b>         | <b>0.06 (0.06)</b>      | <b>0.04 (0.03)</b>       | 0.38 (0.40)             |
| <i>Male</i>            | <i>Mouth_Slightly_Open</i> | <i>Mustache</i>         | <i>Receding_Hairline</i> | <i>Rosy_Cheeks</i>      |
| 0.42 (0.39)            | 0.48 (0.50)                | <b>0.04 (0.04)</b>      | <b>0.08 (0.08)</b>       | <b>0.06 (0.07)</b>      |
| <i>Sideburns</i>       | <i>Smiling</i>             | <i>Wearing_Earrings</i> | <i>Wearing_Hat</i>       | <i>Wearing_Lipstick</i> |
| <b>0.06 (0.05)</b>     | 0.48 (0.50)                | <b>0.19 (0.21)</b>      | <b>0.05 (0.04)</b>       | 0.47 (0.52)             |
| <i>Wearing_Necktie</i> | <i>Young</i>               |                         |                          |                         |
| <b>0.12 (0.14)</b>     | 0.78 (0.76)                |                         |                          |                         |

**Cat vs Dog** contains 17400 training samples, 5800 test samples of various size.

**Imagenet** contains 1M training samples, 100 000 samples for test of various size.

**preprocessing:** For FashionMNIST Images are normalized between  $[0, 1]$  with no augmentation. For CelebA dataset, data augmentation is used with random crop, horizontal flip, random brightness, and random contrast. For imagenet and cat vs dog we use the standart preprocessing of resnet (with no normalization in  $[0, 1]$ )

### A.2.2 Architectures

As indicated in the paper, linear layers for OTNN and unconstrained networks are equivalent (same number of layers and neurons), but unconstrained networks use batchnorm and ReLU layer for activation, whereas OTNN only use GroupSort2 [5, 53] activation. OTNN are built using *DEEL.LIP*<sup>2</sup> library.

**1-Lipschitz networks parametrization.** Several solutions have been proposed to set the Lipschitz constant of affine layers: Weight clipping [6] (WGAN), Frobenius normalization [51] and spectral normalization [43]. In order to avoid vanishing gradients, orthogonalization can be done using Björck algorithm [9]. DEEL.LIP implements most of these solutions, but we focus on layers called *SpectralDense* and *SpectralConv2D*, with spectral normalization [43] and Björck algorithm [9]. Most activation functions are Lipschitz, including ReLU, sigmoid, but we use GroupSort2 proposed by [5], and defined by the following equation:

$$\text{GroupSort2}(x)_{2i, 2i+1} = [\min(x_{2i}, x_{2i+1}), \max(x_{2i}, x_{2i+1})]$$

Network architectures used for CelebA dataset are described in Table 3.

Network architectures used for FashionMNIST dataset are described in Table 4. The same OTNN architecture is used for MNIST experimentation presented in Fig. 1.

<sup>2</sup><https://github.com/deel-ai/deel-lip> distributed under MIT License (MIT)

Table 3: CelebA Neural network architectures: Sconv2D is SpectralConv2D, GS2 is GroupSort2, L2Pool is L2NormPooling, SDense is SpectralDense, BN is BatchNorm, AvgPool is AveragePooling

| Dataset | OTNN                 | Unconstrained NN         |                            |
|---------|----------------------|--------------------------|----------------------------|
|         | Layer                | Layer                    | Output size                |
| CelebA  | Input                | Input                    | $218 \times 178 \times 3$  |
|         | SConv2D, GS2         | Conv2D, BN, ReLU         | $218 \times 178 \times 16$ |
|         | SConv2D, GS2         | Conv2D, BN, ReLU         | $218 \times 178 \times 16$ |
|         | L2Pool               | AvgPool                  | $109 \times 89 \times 16$  |
|         | SConv2D, GS2         | Conv2D, BN, ReLU         | $109 \times 89 \times 32$  |
|         | SConv2D, GS2         | Conv2D, BN, ReLU         | $109 \times 89 \times 32$  |
|         | L2Pool               | AvgPool                  | $54 \times 44 \times 32$   |
|         | SConv2D, GS2         | Conv2D, BN, ReLU         | $54 \times 44 \times 64$   |
|         | SConv2D, GS2         | Conv2D, BN, ReLU         | $54 \times 44 \times 64$   |
|         | SConv2D, GS2         | Conv2D, BN, ReLU         | $54 \times 44 \times 64$   |
|         | L2Pool               | AvgPool                  | $27 \times 22 \times 64$   |
|         | SConv2D, GS2         | Conv2D, BN, ReLU         | $27 \times 22 \times 128$  |
|         | SConv2D, GS2         | Conv2D, BN, ReLU         | $27 \times 22 \times 128$  |
|         | SConv2D, GS2         | Conv2D, BN, ReLU         | $27 \times 22 \times 128$  |
|         | L2Pool               | AvgPool                  | $13 \times 11 \times 128$  |
|         | SConv2D, GS2         | Conv2D, BN, ReLU         | $13 \times 11 \times 128$  |
|         | SConv2D, GS2         | Conv2D, BN, ReLU         | $13 \times 11 \times 128$  |
|         | SConv2D, GS2         | Conv2D, BN, ReLU         | $13 \times 11 \times 128$  |
|         | L2Pool               | AvgPool                  | $6 \times 5 \times 128$    |
|         | Flatten, SDense, GS2 | Flatten, Dense, BN, ReLU | 256                        |
|         | SDense, GS2          | Dense, BN, ReLU          | 256                        |
|         | SDense               | Dense                    | 22                         |

531 The 1-Lipschitz version of resnet50 is described in Table 5. As the unconstrained version, It has  
532 around 25M parameters. For the large version, we simply multiply the number channels in hidden  
533 layers by 1.5. The unconstrained version is the standart resnet50 architecture. In the case of imagenet  
we use the pretrained version provided by tensorflow.

Table 4: FashionMNIST Neural network architectures: Sconv2D is SpectralConv2D, GS2 is GroupSort2, SDense is SpectralDense, BN is BatchNorm, AvgPool is AveragePooling, SGAvgPool is ScaledGlobalAveragePooling (DEEL.LIP), GAvgPool is GlobalAveragePooling

| Dataset      | OTNN                    | Unconstrained NN            |                           |
|--------------|-------------------------|-----------------------------|---------------------------|
|              | Layer                   | Layer                       | Output size               |
| FashionMNIST | Input                   | Input                       | $28 \times 28 \times 1$   |
|              | SConv2D, GS2            | Conv2D, BN, ReLU            | $28 \times 28 \times 96$  |
|              | SConv2D, GS2            | Conv2D, BN, ReLU            | $28 \times 28 \times 96$  |
|              | SConv2D, GS2            | Conv2D, BN, ReLU            | $28 \times 28 \times 96$  |
|              | SConv2D (stride=2), GS2 | Conv2D (stride=2), BN, ReLU | $14 \times 14 \times 96$  |
|              | SConv2D, GS2            | Conv2D, BN, ReLU            | $14 \times 14 \times 192$ |
|              | SConv2D, GS2            | Conv2D, BN, ReLU            | $14 \times 14 \times 192$ |
|              | SConv2D, GS2            | Conv2D, BN, ReLU            | $14 \times 14 \times 192$ |
|              | SConv2D (stride=2), GS2 | Conv2D (stride=2), BN, ReLU | $7 \times 7 \times 192$   |
|              | SConv2D, GS2            | Conv2D, BN, ReLU            | $7 \times 7 \times 384$   |
|              | SConv2D, GS2            | Conv2D, BN, ReLU            | $7 \times 7 \times 384$   |
|              | SConv2D, GS2            | Conv2D, BN, ReLU            | $7 \times 7 \times 384$   |
|              | SGAvgPool               | GAvgPool                    | 384                       |
|              | SDense                  | Dense                       | 10                        |

Table 5: 1-lip resnet architecture for Imagenet and cat vs dog: Sconv2D is SpectralConv2D, GS2 is GroupSort2, SDense is SpectralDense, BC is Batchcentering (centeing without normalization), SL2npool is ScaledL2NormPooling2D, SGAvgl2Pool is ScaledGlobalL2NormPooling2D, GAvgPool is GlobalAveragePooling

| Layer                                                                                                                                                                                                                                                                                                                                                                                     | output                        |
|-------------------------------------------------------------------------------------------------------------------------------------------------------------------------------------------------------------------------------------------------------------------------------------------------------------------------------------------------------------------------------------------|-------------------------------|
| Input                                                                                                                                                                                                                                                                                                                                                                                     | $224 \times 224 \times 3$     |
| SConv2D 7-64 (stride=2), BC, GS2                                                                                                                                                                                                                                                                                                                                                          | $112 \times 112 \times 64$    |
| InvertibleDownSampling                                                                                                                                                                                                                                                                                                                                                                    | $56 \times 56 \times 256$     |
| <div style="display: flex; align-items: center;"> <div style="border-left: 1px solid black; border-right: 1px solid black; padding: 0 5px;"> SConv2D <math>1 \times 1</math> 64 BC, GS2<br/> SConv2D <math>3 \times 3</math> 64 BC, GS2<br/> SConv2D <math>1 \times 1</math> 256 BC<br/> add-lip BC, GS2 </div> <div style="margin: 0 10px;">×3</div> <div>56 × 56 × 256</div> </div>     |                               |
| SL2npool                                                                                                                                                                                                                                                                                                                                                                                  | $28 \times 28 \times 256$     |
| <div style="display: flex; align-items: center;"> <div style="border-left: 1px solid black; border-right: 1px solid black; padding: 0 5px;"> SConv2D <math>1 \times 1</math> 128 BC, GS2<br/> SConv2D <math>3 \times 3</math> 128 BC, GS2<br/> SConv2D <math>1 \times 1</math> 512 BC<br/> add-lip BC, GS2 </div> <div style="margin: 0 10px;">×4</div> <div>28 × 28 × 512</div> </div>   |                               |
| SL2npool                                                                                                                                                                                                                                                                                                                                                                                  | $14 \times 14 \times 512$     |
| <div style="display: flex; align-items: center;"> <div style="border-left: 1px solid black; border-right: 1px solid black; padding: 0 5px;"> SConv2D <math>1 \times 1</math> 256 BC, GS2<br/> SConv2D <math>3 \times 3</math> 256 BC, GS2<br/> SConv2D <math>1 \times 1</math> 1024 BC<br/> add-lip BC, GS2 </div> <div style="margin: 0 10px;">×6</div> <div>14 × 14 × 1024</div> </div> |                               |
| SL2npool                                                                                                                                                                                                                                                                                                                                                                                  | $7 \times 7 \times 1024$      |
| <div style="display: flex; align-items: center;"> <div style="border-left: 1px solid black; border-right: 1px solid black; padding: 0 5px;"> SConv2D <math>1 \times 1</math> 256 BC, GS2<br/> SConv2D <math>3 \times 3</math> 256 BC, GS2<br/> SConv2D <math>1 \times 1</math> 1024 BC<br/> add-lip BC, GS2 </div> <div style="margin: 0 10px;">×3</div> <div>7 × 7 × 2048</div> </div>   |                               |
| SGAvgl2Pool                                                                                                                                                                                                                                                                                                                                                                               | 2048                          |
| SDense                                                                                                                                                                                                                                                                                                                                                                                    | 1 cat vs dog<br>1000 imagenet |

### 535 A.2.3 Losses and optimizer

536 An extension of  $\mathcal{L}^{hKR}$  to the multiclass case with  $q$  classes. has also been proposed in [53] The  
537 idea is to learn  $q$  1-Lipschitz functions  $f_1, \dots, f_q$ , each component  $f_i$  being a *one-versus-all* binary  
538 classifier. The loss proposed was the following

$$\mathcal{L}_{\lambda, m}^{hKR}(f_{1, \dots, q}) = \sum_{k=1}^q \left[ \mathbb{E}_{\mathbf{x} \sim \neg P_k} [f_k(\mathbf{x})] - \mathbb{E}_{\mathbf{x} \sim P_k} [f_k(\mathbf{x})] \right] + \lambda \mathbb{E}_{\mathbf{x}, y \sim \bigcup_{k=1}^q P_k} (H(f_1(\mathbf{x}), \dots, f_q(\mathbf{x}), y, m)) \quad (4)$$

with :

$$H(f_1(\mathbf{x}), \dots, f_q(\mathbf{x}), y, m) = (m - f_y(\mathbf{x}))_+ + \sum_{k \neq y} (m + f_k(\mathbf{x}))_+$$

539 This formulation has three main drawbacks: (i) for large number of classes several outputs may  
540 have few or no positive sample within a batch leading to slow convergence, (ii) weight of  $f_y(\mathbf{x})$  (the  
541 function of the true class) with respect to the other decreases when the number of classes increases,  
542 (iii) the expectancy has to be evaluated through the batch, making the loss dependant of the size of  
543 the batch.

544 To overcome these drawbacks, we propose first to replace the Hinge term  $H$  with a softmax weighted  
545 version. The softmax on all but true class is defined by:

$$\sigma(f_k(\mathbf{x}), y, \alpha) = \frac{e^{\alpha * f_k(\mathbf{x})}}{\sum_{j \neq y} e^{\alpha * f_j(\mathbf{x})}}$$

546 We can define a weighted version of  $H$  function:

$$H_{\sigma}(f_1(\mathbf{x}), \dots, f_q(\mathbf{x}), y, m, \alpha) = (m - f_y(\mathbf{x}))_+ + \sum_{k \neq y} \sigma(f_k(\mathbf{x}), y, \alpha) * (m + f_k(\mathbf{x}))_+$$

547 In this function, the value of  $f_y(\mathbf{x})$  for the true class maintains consistent weight relative to the values  
 548 of other functions, regardless of the number of classes.  $\alpha$  is a temperature parameter. Initially, the  
 549 softmax behaves like an average as all the values of  $f_k$  are close. However, during the learning  
 550 process, as the values of  $|f_k|$  increase, the softmax transitions to function like a maximum. Similarly,  
 551 if a low value is chosen for  $\alpha$ , the softmax behaves as an average, resulting in a one vs all hKR loss.  
 552 By choosing a higher value for  $\alpha$ , the softmax unbalances the weights. Thus the loss persists as a one  
 553 vs all hKR but incorporates a re-weighting of the opposing classes for each targeted class.

554 We also propose a sample-wise and weighted version of the KR part (left term in Eq 4). to get the  
 555 proposed loss:

$$\mathcal{L}_{\lambda, m, \alpha}^{hKR}(f_{1, \dots, q}, x, y) = \left[ \sum_{k \neq y} [f_k(\mathbf{x}) * \sigma(f_k(\mathbf{x}), y, \alpha)] - f_y(\mathbf{x}) \right] + \lambda * H_{\sigma}(f_1(\mathbf{x}), \dots, f_q(\mathbf{x}), y, m, \alpha) \quad (5)$$

556 It's important to note that this definition only applies to the balanced multiclass case (as in FashionM-  
 557 nist and ImageNet). In the unbalanced scenario, the weight must be rescaled according to the a priori  
 558 distribution of the classes.

559 For CelebA, with hyperparameters  $\lambda$  is set to 20, and  $m = 1$ . For FashionMNIST, we use Eq. 5,  $\lambda$  is  
 560 set to 5,  $\alpha = 10$  and  $m = 0.5$ . For cat vs dog  $\lambda$  is set to 10 and  $m = 18$ . For imagenet  $\lambda$  is set to  
 561 500,  $\alpha = 200$  and  $m = 0.05$ .

562 We train all networks with ADAM optimizer [36]. We use a batch size of 128, 200 epochs, and a  
 563 fixed learning rate  $1e-2$  for CelebA. For FashionMNIST we perform 200 epochs with a batch size of  
 564 128. We fix the learning rate to  $5e-4$  for the 50 first epochs,  $5e-5$  for the epochs 50-75,  $1e-6$  for the  
 565 last epochs. For cat vs dog we perform 200 epochs with a batch size of 256. We fix the learning rate  
 566 to  $1e-2$  for the 100 first epochs,  $1e-3$  for the epochs 100-150,  $1e-4$  for the epochs 150-180 and  
 567  $1e-9$  for the last epochs. For imagenet we perform 40 epochs with a batch size of 512. We fix the  
 568 learning rate to  $5e-4$  for the 30 first epochs,  $5e-5$  for the epochs 30-35,  $1e-5$  for the epochs 35-38  
 569 and  $1e-9$  for the last epochs.

### A.3 Complementary results

#### A.3.1 FashionMNIST performances and ablation study

Table 6 presents different performance results on FashionMNIST. First line is the reference unconstrained network. Second line shows the performances of the new version of  $\mathcal{L}_{\lambda,\alpha}^{hKR}$ . Table 6 also shows that the new version of the  $\mathcal{L}_{\lambda,m,\alpha}^{hKR}$  in the multiclass case (Eq. 5) outperforms the  $\mathcal{L}_{\lambda,m}^{hKR}$  defined in [53] (Eq. 4). Obviously, the accuracy enhancement is obtained at the expense of the robustness. The main interest of this new loss is to provide a wider range in the accuracy/robustness trade-off.

Table 6: FashionMNIST accuracy comparison with the different version of multiclass  $\mathcal{L}_{\lambda,m}^{hKR}$ . For the fixed margin, we use the one that performs best by parameter tuning (i.e.  $m = 0.5$ )

| Model                                                                                               | Accuracy    |
|-----------------------------------------------------------------------------------------------------|-------------|
| Unconstrained                                                                                       | 88.5        |
| OTNN $\mathcal{L}_{\lambda,m}^{hKR}$ multiclass version [53] ( $\lambda = 10, m = 0.5$ )            | 72.2        |
| (Ours) OTNN $\mathcal{L}_{\lambda,m,\alpha}^{hKR}$ ( $\lambda = 10, m = 0.5, \alpha = 10$ ) (Eq. 5) | <b>88.6</b> |

#### A.3.2 CelebA performances

Table 7 presents the Sensibility and Specificity for each label reached by Unconstrained network and OTNN.

As a reminder, given True Positive (TP), True Negative (TN), False Positive (FP), False Negative (FN) samples, Sensitivity (true positive rate or Recall) is defined by:

$$Sens = \frac{TP}{TP + FN}$$

Specificity (true negative rate) is defined by:

$$Spec = \frac{TN}{TN + FP}$$

Table 7: CelebA performance results for unconstrained and OTNN networks

| Model         | Metrics: Sensibility/Specificity |                          |                    |                            |
|---------------|----------------------------------|--------------------------|--------------------|----------------------------|
|               | <i>Attractive</i>                | <i>Bald</i>              | <i>Big_Nose</i>    | <i>Black_Hair</i>          |
| Unconstrained | <b>0.83 / 0.81</b>               | 0.64 / 1.00              | <b>0.65 / 0.87</b> | <b>0.74 / 0.95</b>         |
| OTNN          | 0.80 / 0.75                      | <b>0.87 / 0.83</b>       | 0.73 / 0.70        | 0.78 / 0.84                |
|               | <i>Blond_Hair</i>                | <i>Blurry</i>            | <i>Brown_Hair</i>  | <i>Eyeglasses</i>          |
| Unconstrained | <b>0.86 / 0.97</b>               | <b>0.49 / 0.99</b>       | <b>0.80 / 0.88</b> | <b>0.96 / 1.00</b>         |
| OTNN          | 0.86 / 0.89                      | 0.66 / 0.72              | 0.81 / 0.73        | 0.80 / 0.89                |
|               | <i>Gray_Hair</i>                 | <i>Heavy_Makeup</i>      | <i>Male</i>        | <i>Mouth_Slightly_Open</i> |
| Unconstrained | 0.62 / 0.99                      | <b>0.84 / 0.95</b>       | <b>0.98 / 0.98</b> | <b>0.93 / 0.94</b>         |
| OTNN          | <b>0.84 / 0.83</b>               | 0.89 / 0.83              | 0.92 / 0.89        | 0.80 / 0.89                |
|               | <i>Mustache</i>                  | <i>Receding_Hairline</i> | <i>Rosy_Cheeks</i> | <i>Sideburns</i>           |
| Unconstrained | 0.47 / 0.99                      | 0.47 / 0.98              | 0.46 / 0.99        | <b>0.79 / 0.98</b>         |
| OTNN          | <b>0.86 / 0.76</b>               | <b>0.81 / 0.79</b>       | <b>0.82 / 0.80</b> | 0.79 / 0.82                |
|               | <i>Smiling</i>                   | <i>Wearing_Earrings</i>  | <i>Wearing_Hat</i> | <i>Wearing_Lipstick</i>    |
| Unconstrained | <b>0.90 / 0.95</b>               | <b>0.84 / 0.90</b>       | <b>0.89 / 0.99</b> | <b>0.90 / 0.96</b>         |
| OTNN          | 0.84 / 0.88                      | 0.78 / 0.72              | 0.86 / 0.90        | 0.90 / 0.89                |
|               | <i>Wearing_Necktie</i>           | <i>Young</i>             |                    |                            |
| Unconstrained | 0.75 / 0.98                      | <b>0.95 / 0.65</b>       |                    |                            |
| OTNN          | <b>0.87 / 0.86</b>               | 0.79 / 0.69              |                    |                            |

## 580 A.4 Complementary explanations metrics

### 581 A.4.1 Explanation attribution methods

582 An attribution method provides an importance score for each input variables  $x_i$  in the output  $f(x)$ .  
 583 The library used to generate the attribution maps is Xplique [21].

584 For a full description of attribution methods, we advise to read [18], Appendix B. We will only  
 585 remind here the equations of

- 586 • Saliency:  $g(x) = |\nabla_x f(x)|$
- 587 • SmoothGrad:  $g(x) = \mathbb{E}_{\delta \sim \mathcal{N}(0, \mathbf{I}\sigma)} (\nabla f(x + \delta))$

588 SmoothGrad is evaluated on  $N = 50$  samples on a normal distribution of standard deviation  $\sigma = 0.2$   
 589 around  $x$ . Integrated Gradient [59], noted IG, is also evaluated on  $N = 50$  samples at regular intervals.  
 590 Grad-CAM [52], noted GC, is classically applied on the last convolutional layer.

### 591 A.4.2 XAI metrics

592 For the experiments we use four fidelity metrics, evaluated on 1000 samples of test datasets:

- 593 • Deletion [47]: it consists in measuring the drop of the score when the important variables are  
 594 set to a baseline state. Formally, at step  $k$ , with  $u$  the  $k$  most important variables according  
 595 to an attribution method, the  $\text{Deletion}^{(k)}$  score is given by:

$$\text{Deletion}^{(k)} = f(x_{[x_u=x_0]})$$

596 The AUC of the Deletion scores is then measured to compare the attribution methods ( $\downarrow$  is  
 597 better). The baseline  $x_0$  can either be a zero value (*Deletion-zero*), or a uniform random  
 598 value (*Deletion-uniform*).

- Insertion [47]: this metric is the inverse of Deletion, starting with an image in a baseline  
 state and then progressively adding the most important variables. Formally, at step  $k$ , with  $u$   
 the most important variables according to an attribution method, the  $\text{Insertion}^{(k)}$  score is  
 given by:

$$\text{Insertion}^{(k)} = f(x_{[x_{\bar{u}}=x_0]})$$

599 The AUC is also measured to compare attribution methods ( $\uparrow$  is better). The baseline is the  
 600 same as for Deletion.

- $\mu\text{Fidelity}$  [8]: this metric measures the correlation between the fall of the score when  
 variables are put at a baseline state and the importance of these variables. Formally:

$$\mu\text{Fidelity} = \text{Corr}_{u \subseteq \{1, \dots, d\} \atop |u|=k} \left( \sum_{i \in u} g(x)_i, f(x) - f(x_{[x_u=x_0]}) \right)$$

601 For all experiments,  $k$  is equal to 20% of the total number of variables, and cutting the image  
 602 in a grid of  $20 \times 20$  ( $9 \times 9$  for cat vs dog and imagenet). The baseline is the same as the one  
 603 used by Deletion. Being a correlation score, we can either compare attribution methods, or  
 604 different neural networks on the same attribution method ( $\uparrow$  is better).

- Robustness-Sr [31]: this metric evaluate the average adversarial distance when the attack is  
 done only on the most relevant features. Formally, given the  $u$  most important variables:

$$\text{Robustness-Sr} = \left\{ \min_{\delta} \|\delta\| \text{ s.t. } f(x + \delta) \neq_x, \delta_{\bar{u}} = 0 \right\}$$

605 where  $\delta_{\bar{u}} = 0$  indicates that adversarial attack is authorized only on the set  $u$ . The AUC is  
 606 measured to compare attribution methods ( $\downarrow$  is better). Note this metric cannot be used to  
 607 compare different networks, since it depends on the robustness of the network.

608 We use also several other metrics:

- Distances between explanations: to compare two explanation  $f(x)$ , we use either  $L_2$  distance, or  $1 - \rho$  where  $\rho$  is the Spearman rank correlation [2, 20, 60] ( $\downarrow$  is better).
- Explanation complexity: we use the JPEG compression size as a proxy of the Kolmogorov complexity ( $\downarrow$  is better).
- Stability: As proposed in [68], the Stability is evaluated by the average distance of explanations provided for random samples drawn in a ball of radius 0.3 (0.15 for cat vs dog and imagenet) around  $x$ . As before, the distance can be either  $L_2$  or  $1 - \rho$  ( $\downarrow$  is better).

#### A.4.3 Supplementary metric results

In this section we present several experiments and metrics that we were not able to insert in the core of the paper.

Deletion-zero and Insertion-zero are evaluated on CelebA and FashionMNIST dataset. It is known that the baseline value can be a bias for these metrics, and we are convinced that it has a higher influence with 1-Lipschitz networks. Even if results for Deletion-zero and Insertion-zero are less obvious than for Deletion and Insertion Uniform, we can see in Table 8, that for these metrics, the rank of Saliency is most of the time higher for OTNN.

Table 8: Insertion and Deletion metrics evaluation; GC: GradCam, GI: Gradient.Input, IG: Integrated Gradient, Saliency Rk : Rank (comparison by line only : in bold best score)

| Dataset       | Network       | Deletion-Zero (↓ is better)  |       |             |              |                   |             |
|---------------|---------------|------------------------------|-------|-------------|--------------|-------------------|-------------|
|               |               | GC                           | GI    | IG          | Rise         | Saliency          | SmoothGrad  |
|               |               | Deletion-Zero                |       |             |              |                   |             |
| CelebA        | OTNN          | 8.01                         | 7.04  | 7.05        | 7.09         | 6.98 (Rk2)        | <b>6.96</b> |
|               | Unconstrained | 5.77                         | 4.56  | 4.38        | 5.07         | <b>4.13</b> (Rk1) | 4.51        |
| Fashion-MNIST | OTNN          | 0.24                         | 0.16  | <b>0.15</b> | 0.26         | 0.20 (Rk4)        | 0.19        |
|               | Unconstrained | 0.33                         | 0.28  | 0.23        | <b>0.16</b>  | 0.38 (Rk5)        | 0.39        |
|               |               | Insertion-zero (↑ is better) |       |             |              |                   |             |
| CelebA        | OTNN          | 10.26                        | 11.63 | 11.58       | <b>15.50</b> | 10.06 (Rk6)       | 10.10       |
|               | Unconstrained | 14.24                        | 11.71 | 12.37       | <b>15.70</b> | 6.67 (Rk6)        | 7.65        |
| Fashion-MNIST | OTNN          | 0.31                         | 0.46  | <b>0.47</b> | 0.36         | 0.36 (Rk4)        | 0.39        |
|               | Unconstrained | 0.53                         | 0.59  | 0.68        | <b>0.73</b>  | 0.45 (Rk6)        | 0.46        |

To leverage the bias of the baseline value, as proposed in [31] we evaluated the Robustness-SR metric, Saliency map on OTNN achieves top-ranking scores. One might argue that scores for unconstrained networks are lower, but this is directly linked to the higher intrinsic robustness of OTNN and thus cannot be compared.

Table 9: Robustness-SR metrics evaluation; GC: GradCam, GI: Gradient.Input, IG: Integrated Gradient, Saliency Rk : Rank (comparison by line only : in bold best score)

| Dataset       | Network       | Robustness-SR ( $\downarrow$ is better) |       |       |             |                    |             |
|---------------|---------------|-----------------------------------------|-------|-------|-------------|--------------------|-------------|
|               |               | GC                                      | GI    | IG    | Rise        | Saliency           | SmoothGrad  |
| CelebA        | OTNN          | 28.54                                   | 14.01 | 13.28 | 30.54       | <b>11.64</b> (Rk1) | 12.65       |
|               | Unconstrained | 11.11                                   | 9.19  | 10.00 | 15.15       | 7.38 (Rk2)         | <b>7.20</b> |
| Fashion-MNIST | OTNN          | <b>1.69</b>                             | 3.31  | 3.36  | 3.27        | 2.29 (Rk3)         | 2.01        |
|               | Unconstrained | 1.17                                    | 1.36  | 1.17  | <b>1.15</b> | 1.21 (Rk4)         | 1.25        |

The full results for the explanation complexity is given on Table 10. The complexity is still lower for OTNN on FashionMNIST, even if the gap with Unconstrained networks is narrower than for CelebA.

Table 10: Complexity of Saliency map by JPEG compression (kB): lower is better

|               | CelebA | FashionMNIST |
|---------------|--------|--------------|
| OTNN          | 9.48   | 0.92         |
| Unconstrained | 16.84  | 0.94         |

## 630 A.5 Complementary qualitative results

631 In this section, we provide more samples of qualitative results and counterfactual explanations for  
 632 OTNN, based on the gradient, i.e.  $\mathbf{x} - t * \hat{f}(\mathbf{x}) \nabla_{\mathbf{x}} \hat{f}(\mathbf{x})$  for  $t > 1$ .

### 633 A.5.1 FashionMNIST

634 Fig. 6 gives more results on FashionMNIST.

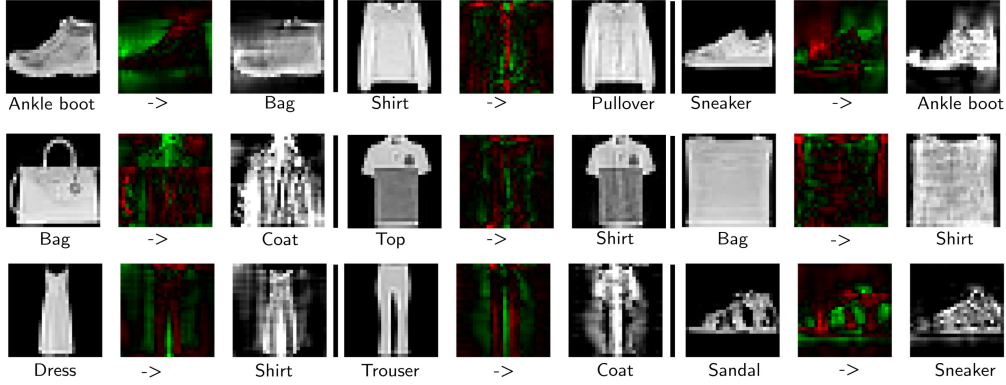

Figure 6: FashionMNIST samples

### 635 A.5.2 CelebA

636 We presents results for other labels of CelebA. For ethic concerns we have hidden labels that can be  
 637 subject to misinterpretation, such as *Attractive*, *Male*, *Big\_Nose*. Fig. 7 to 25 present more results on  
 638 the labels presented in the core of the paper, *Mouth\_Slightly\_Open*, *Mustache*, *Wearing\_Hat*.

### 639 A.5.3 Cat vs Dog

640 We present some supplementary comparison of Saliency Maps and counterfactual examples for cat  
 641 vs dog(Fig. 26 and 27).

### 642 A.5.4 Imagenet

643 We present some supplementary comparison of Saliency Maps Imagenet (Fig. 28). As pointed out  
 644 previously, our model doesn't produce significant counterfacutal explanations on Imagenet.



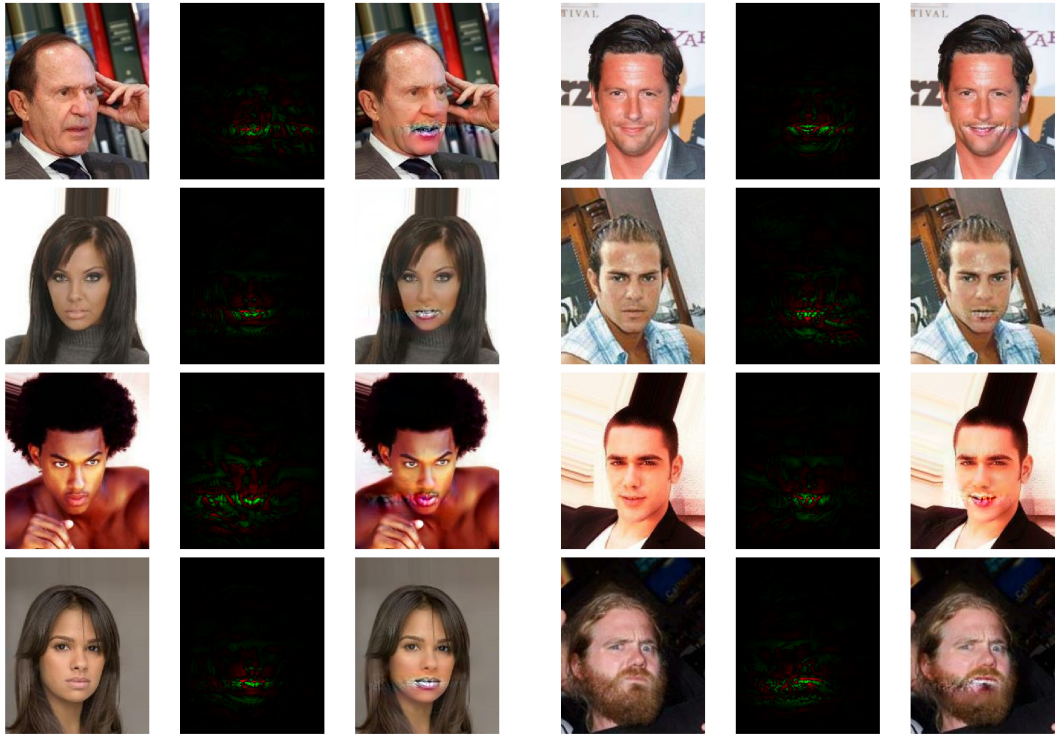

Figure 7: Samples from label Mouth\_slightly\_open: left source image (closed) , center difference image, right counterfactual (open) of form  $\mathbf{x} - 10 * \hat{f}(\mathbf{x}) \nabla_{\mathbf{x}} \hat{f}(\mathbf{x})$

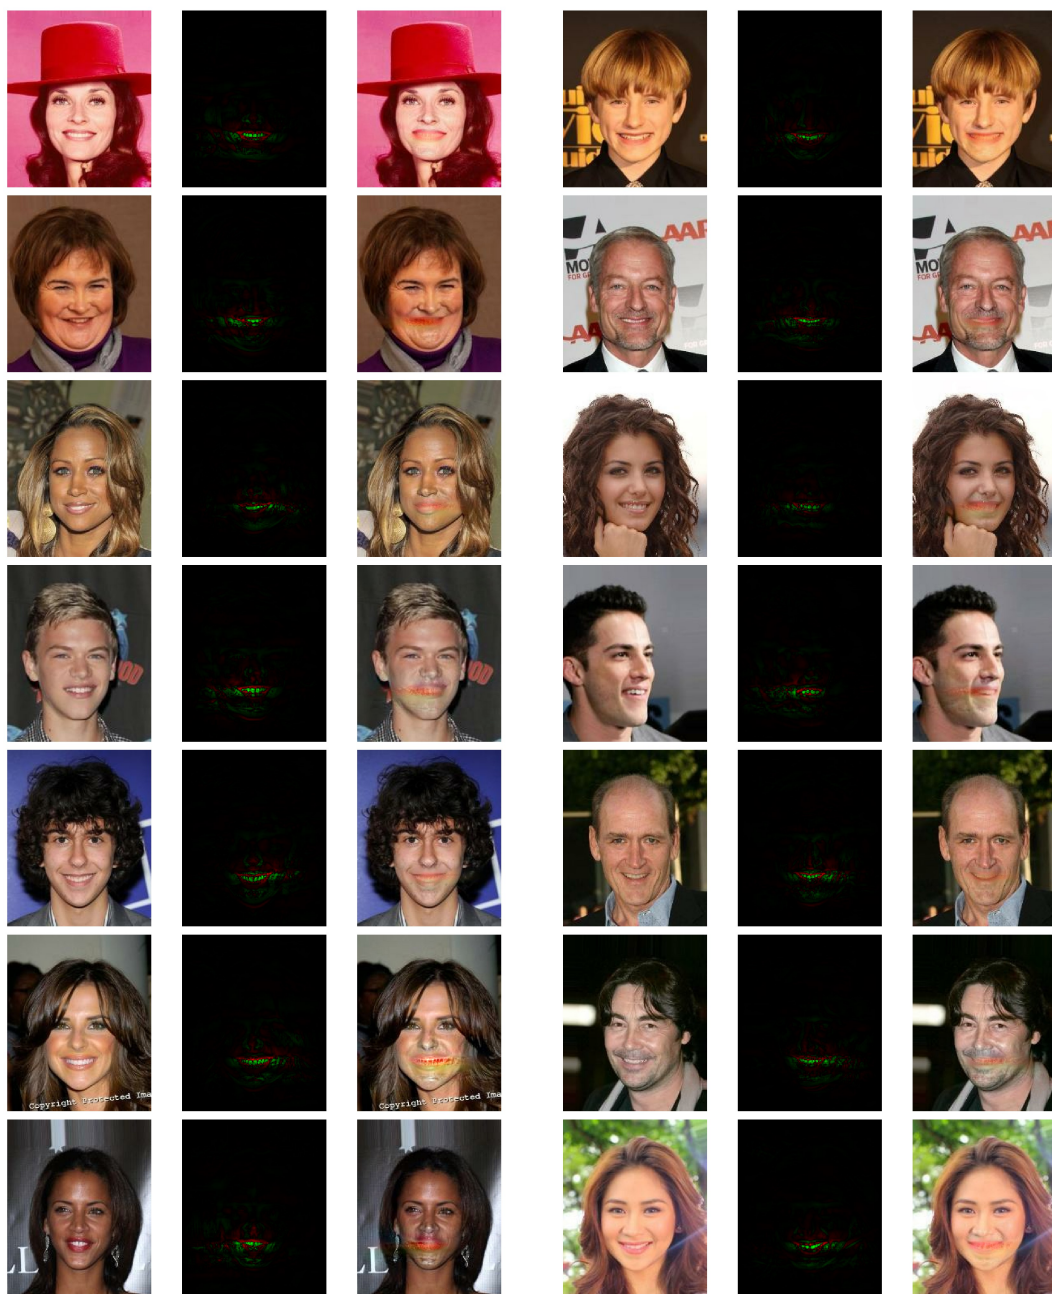

Figure 8: Samples from label Mouth\_slightly\_open: left source image (open) , center difference image, right counterfactual (close) of form  $\mathbf{x} - 10 * \hat{f}(\mathbf{x}) \nabla_{\mathbf{x}} \hat{f}(\mathbf{x})$

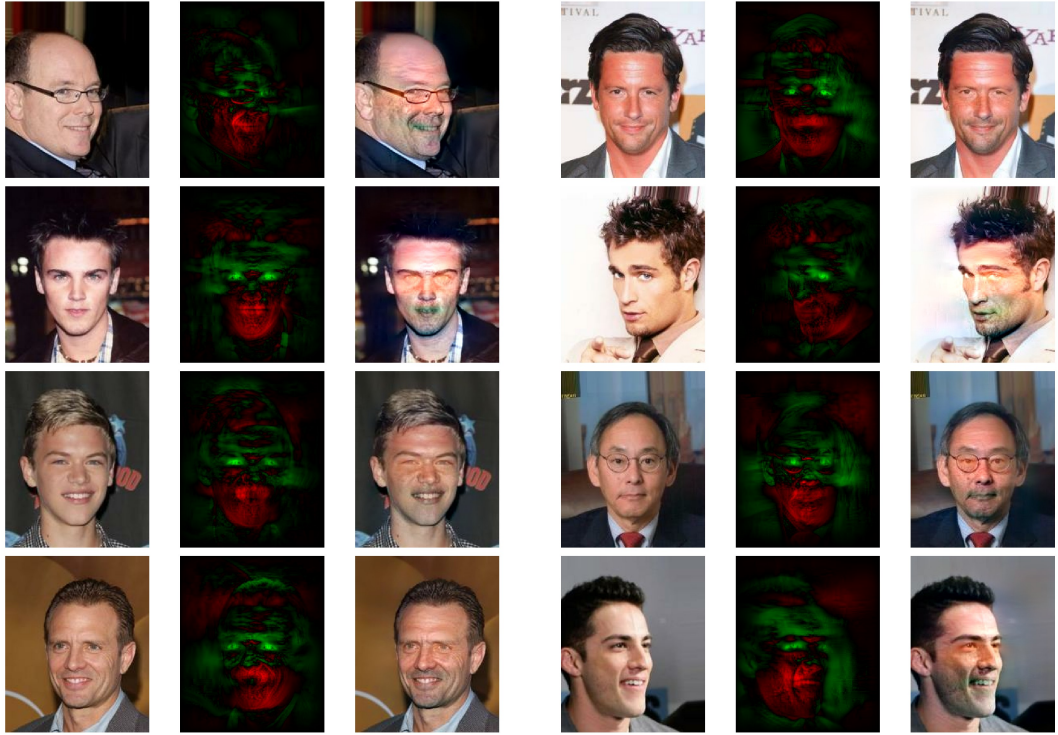

Figure 9: Samples from label Mustache: left source image (no mustache) , center difference image, right counterfactual (mustache) of form  $\mathbf{x} - t * \hat{f}(\mathbf{x}) \nabla_x \hat{f}(\mathbf{x})$  with  $t \in \{5, 10, 20\}$

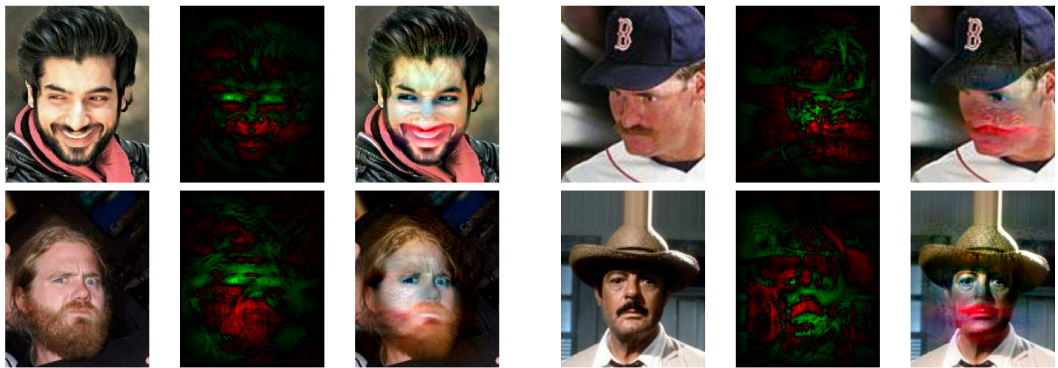

Figure 10: Samples from label Mustache: left source image (Mustache) , center difference image, right counterfactual (Non Mustache) of form  $\mathbf{x} - t * \hat{f}(\mathbf{x}) \nabla_x \hat{f}(\mathbf{x})$ ,  $t \in 5, 10$



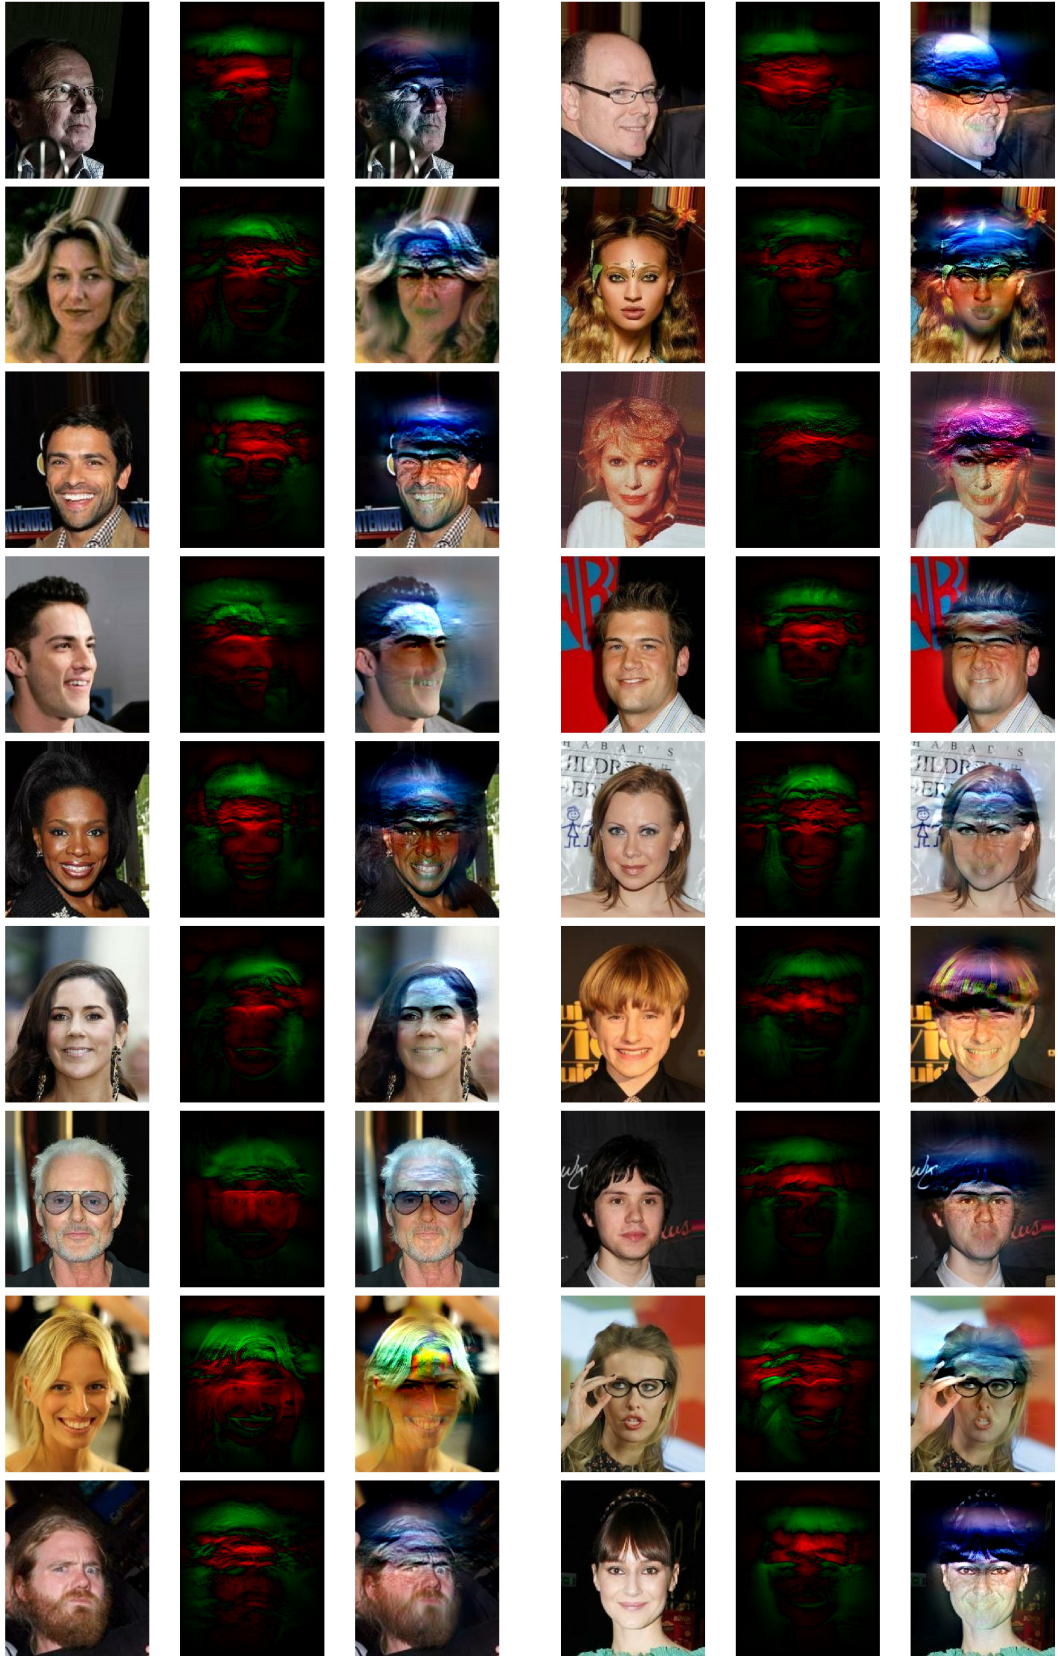

Figure 11: Samples from label Wearing Hat: left source image (No Hat) , center difference image, right counterfactual (Hat) of form  $x - t * \hat{f}(x) \nabla_x \hat{f}(x)$ ,  $t \in 5, 10$

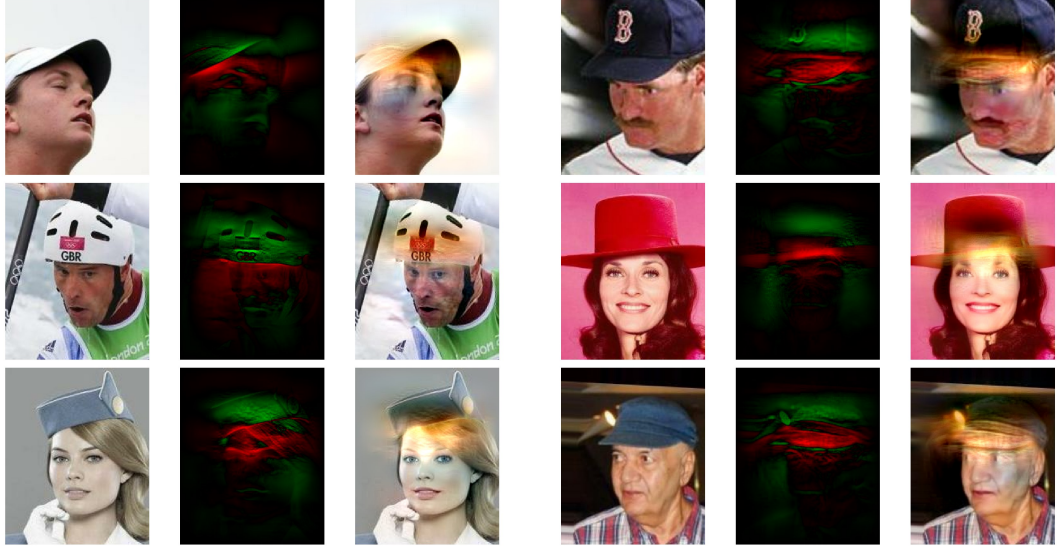

Figure 12: Samples from label Wearing Hat: left source image (Hat) , center difference image, right counterfactual (No Hat) of form  $x - t * \hat{f}(x) \nabla_x \hat{f}(x)$ ,  $t \in 5, 10$

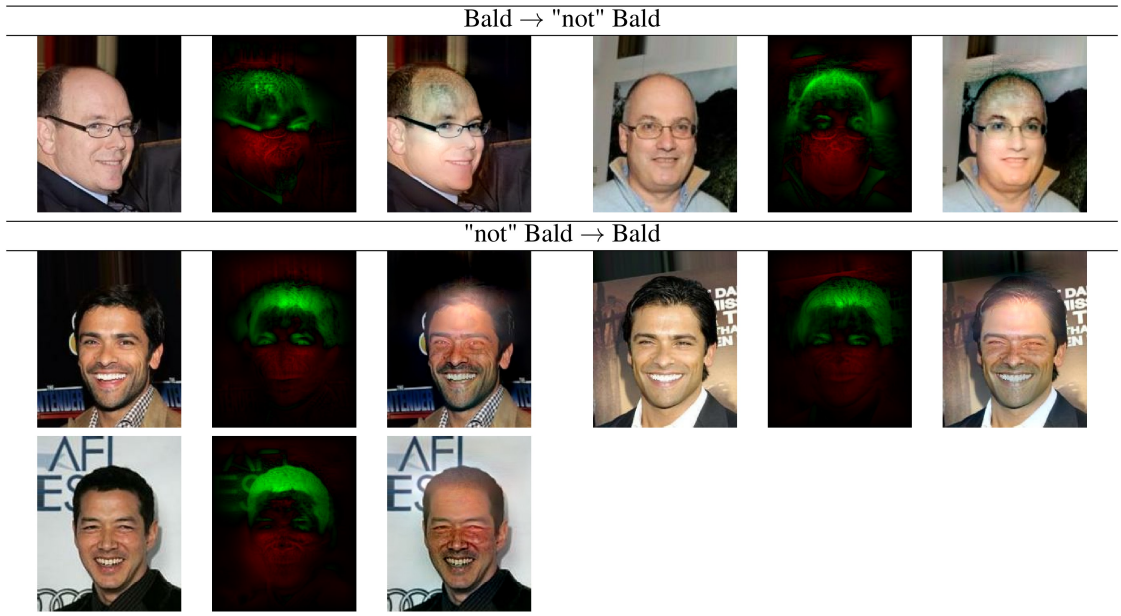

Figure 13: Samples from label Bald



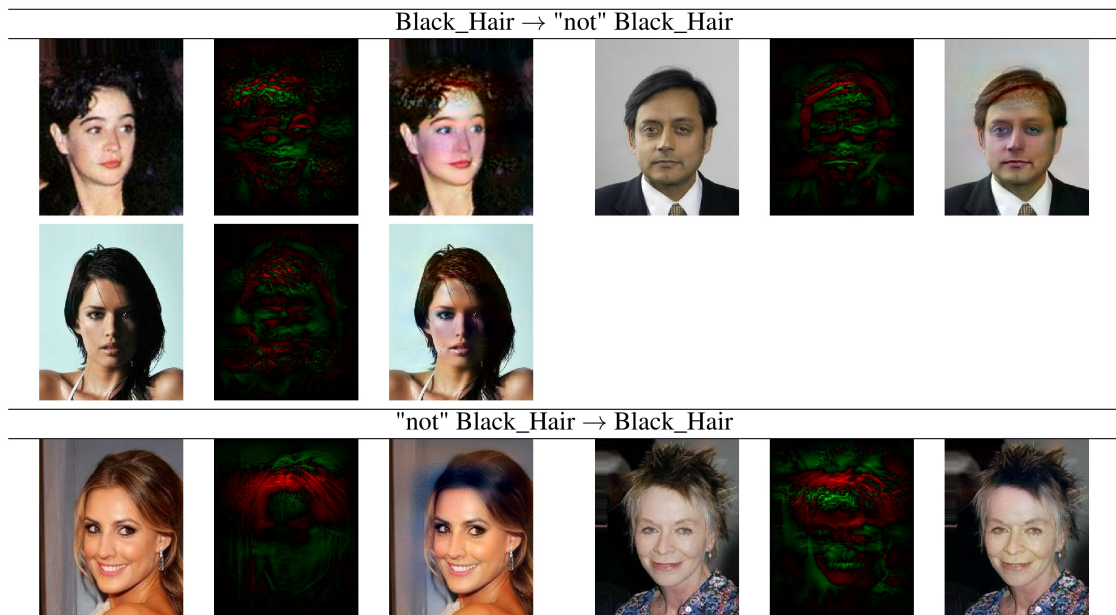

Figure 14: Samples from label Black\_Hair

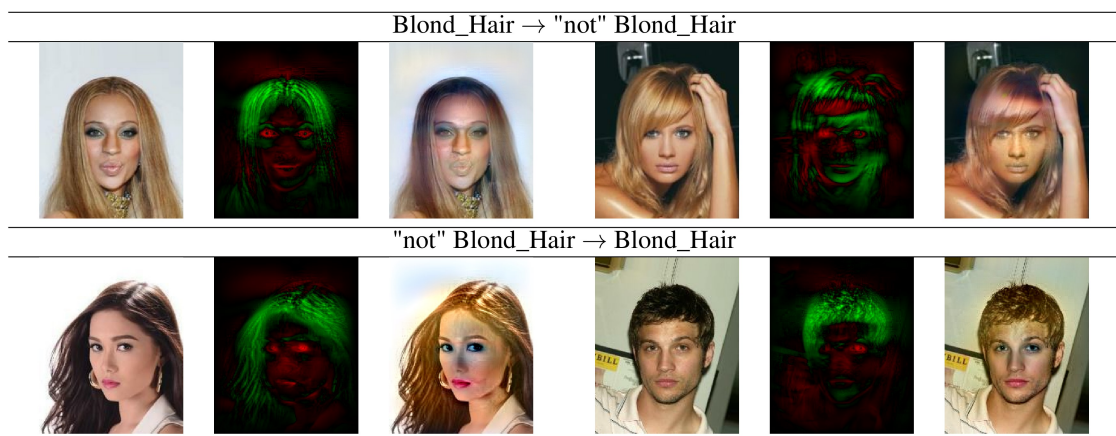

Figure 15: Samples from label Blond\_Hair

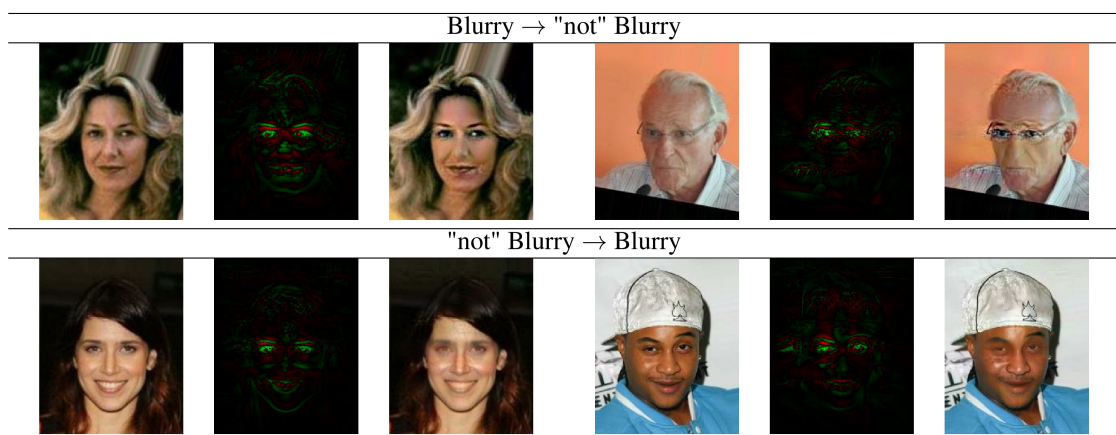

Figure 16: Samples from label Blurry

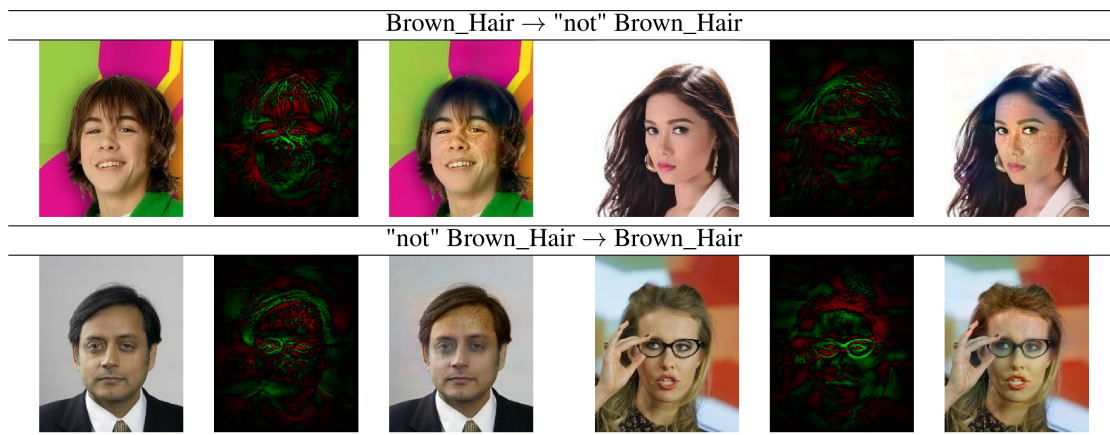

Figure 17: Samples from label Brown\_Hair

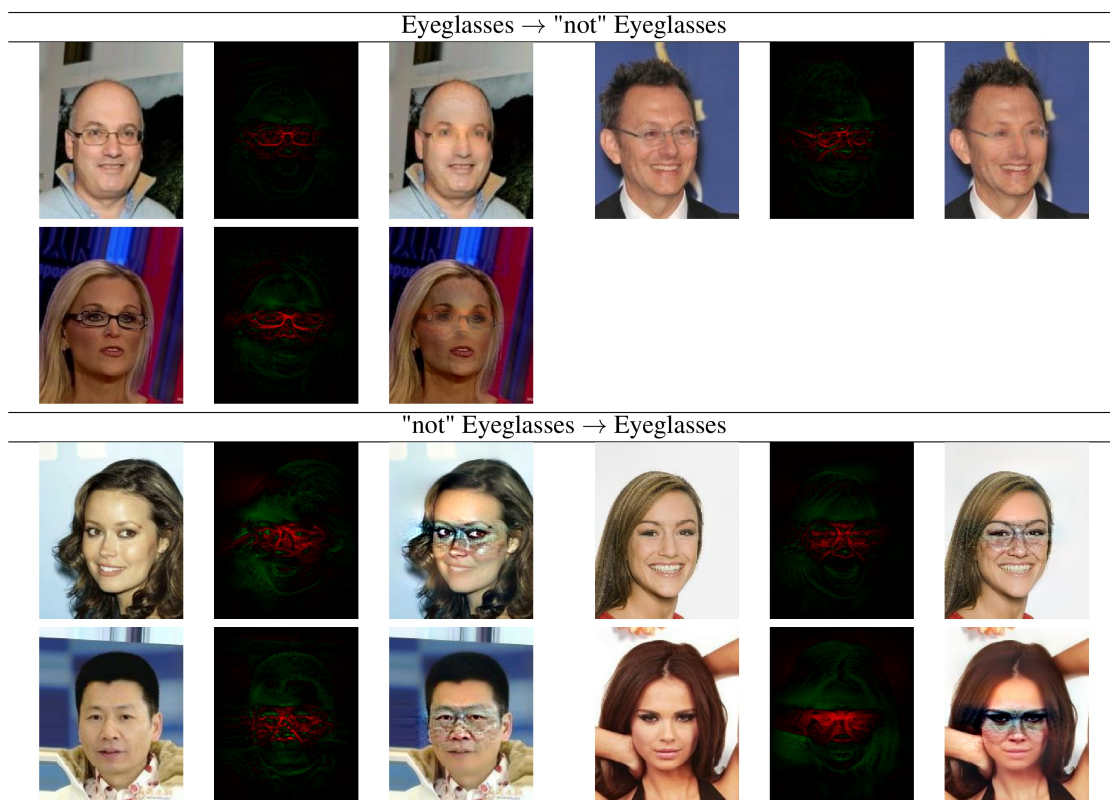

Figure 18: Samples from label Eyeglasses

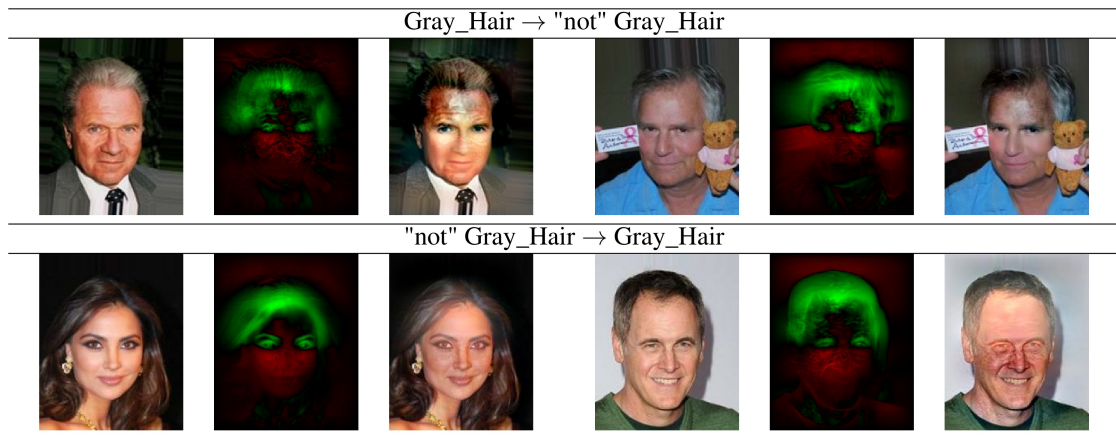

Figure 19: Samples from label Gray\_Hair

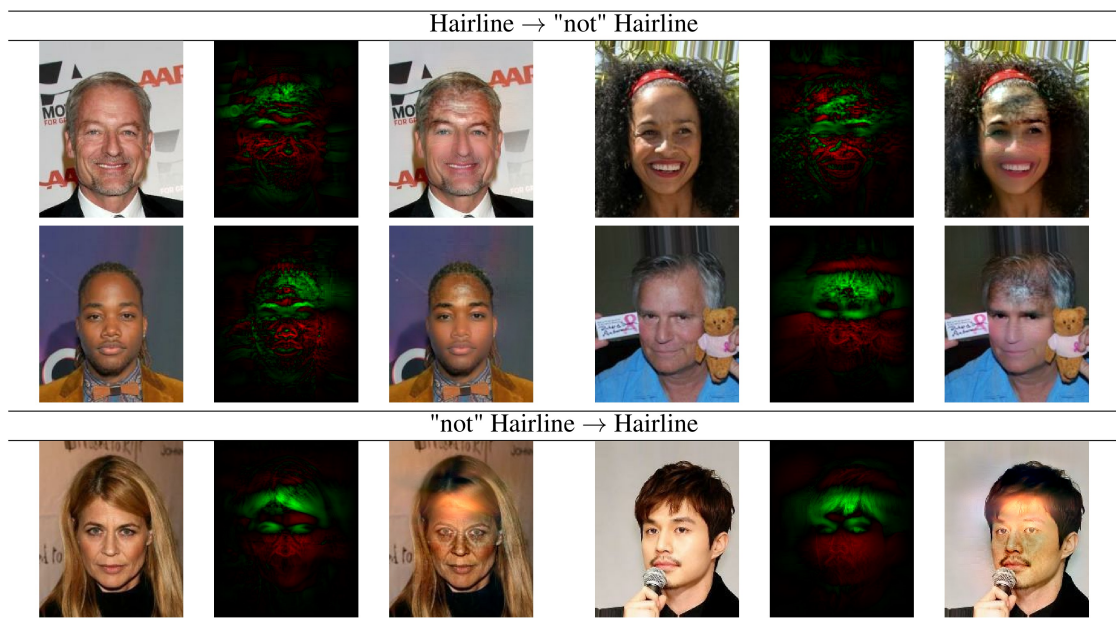

Figure 20: Samples from label Hairline



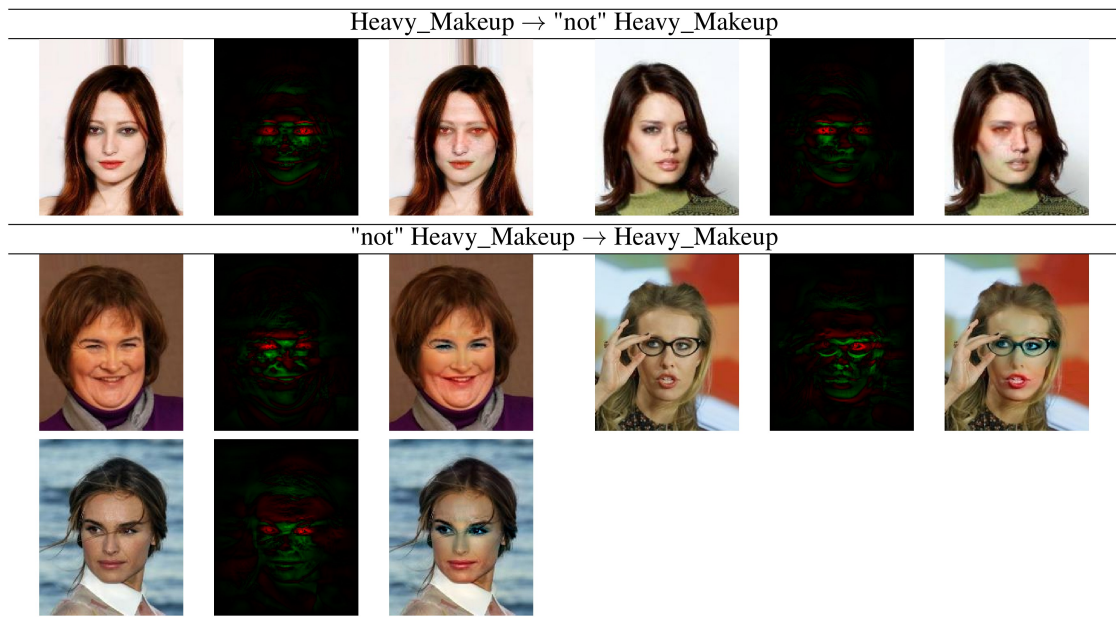

Figure 21: Samples from label Heavy\_Makeup

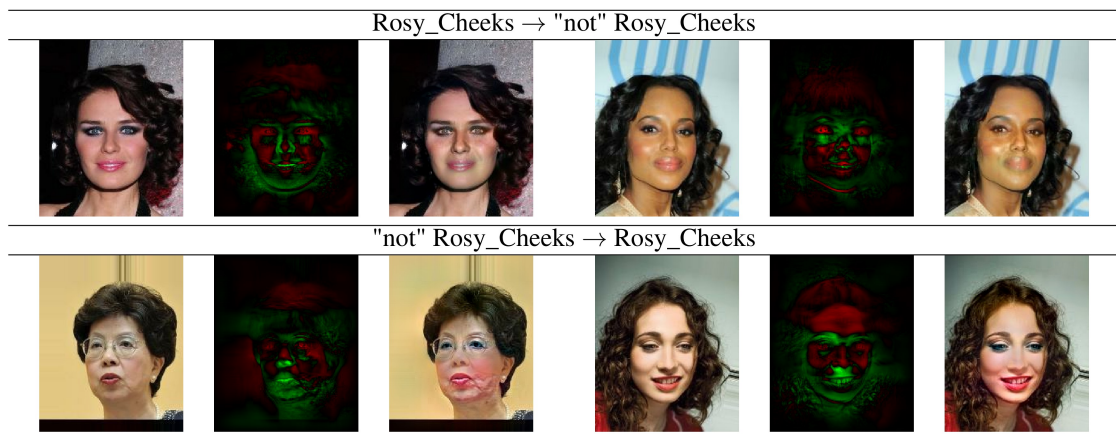

Figure 22: Samples from label Rosy\_Cheeks

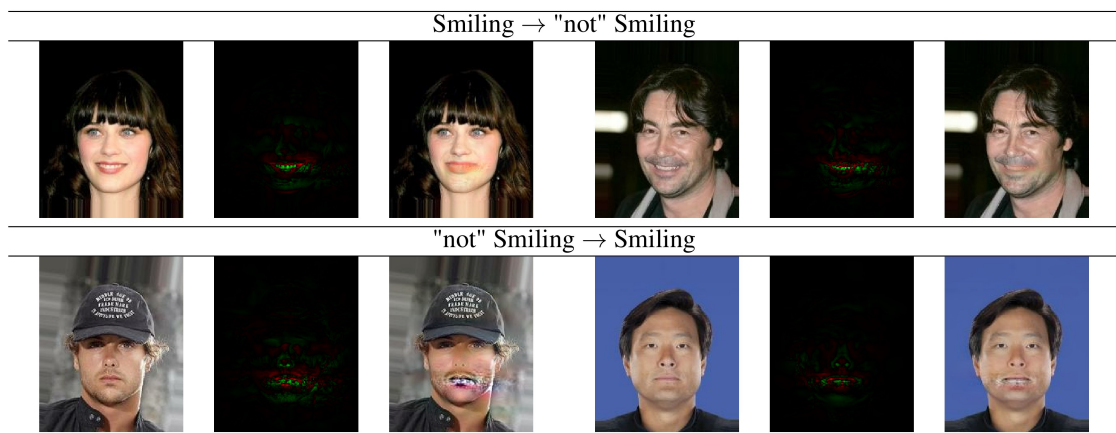

Figure 23: Samples from label Smiling

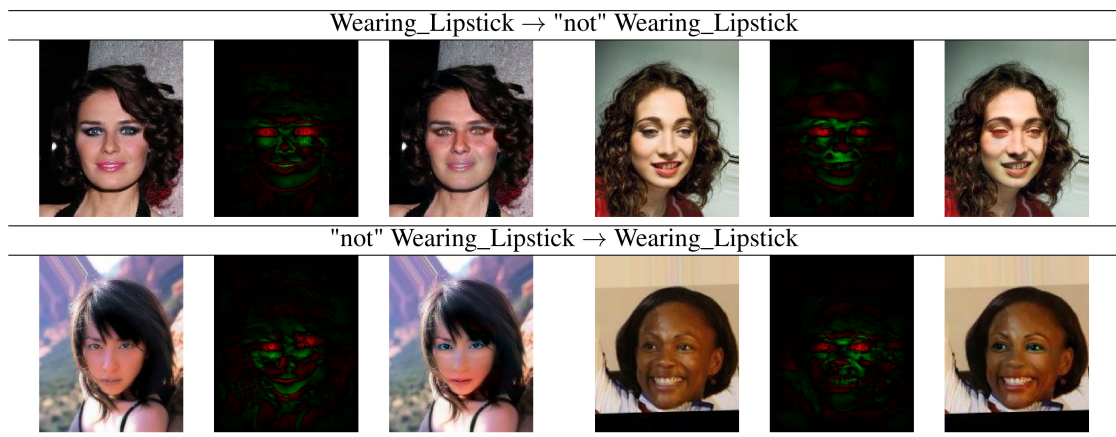

Figure 24: Samples from label Wearing\_Lipstick

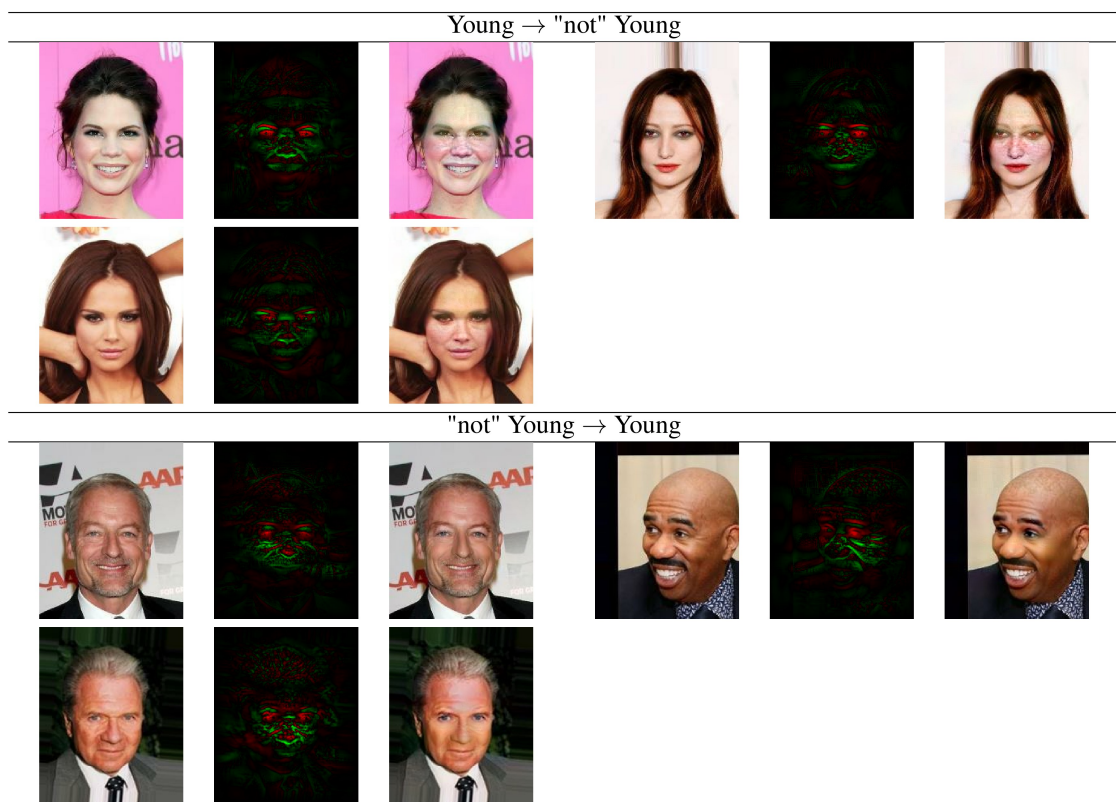

Figure 25: Samples from label Young

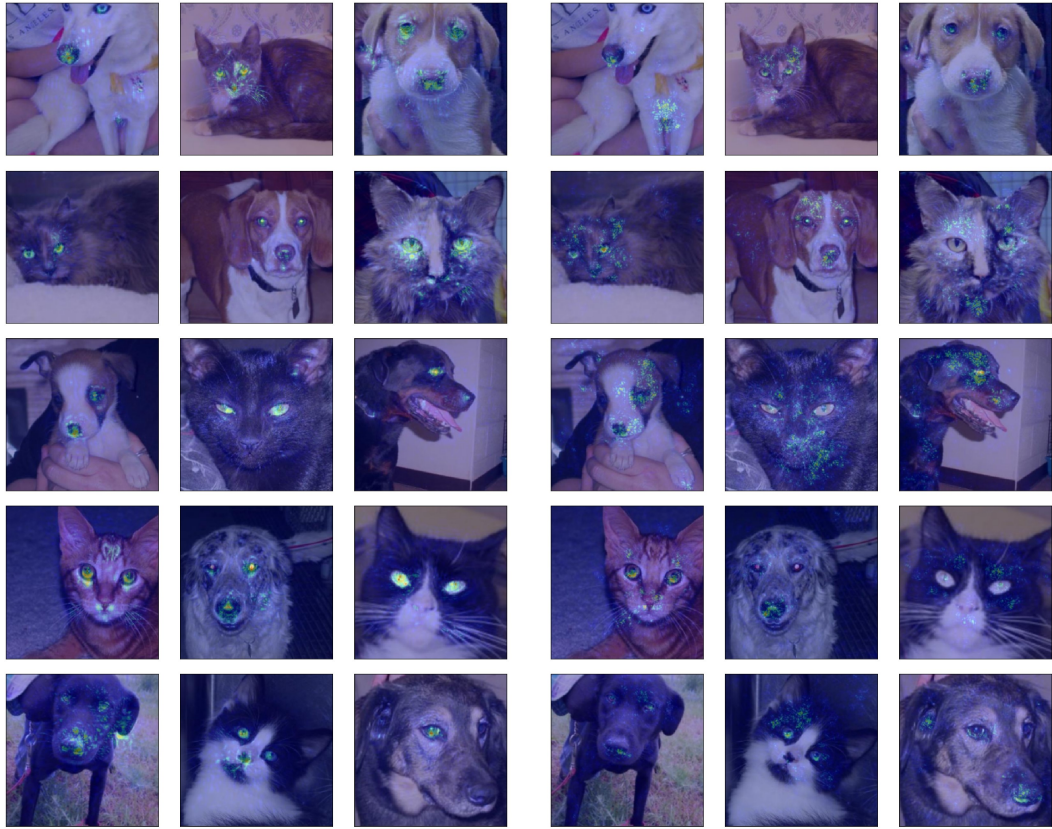

(a) OTNN

(b) Unconstrained

Figure 26: Cat vs Dog Saliency Map samples



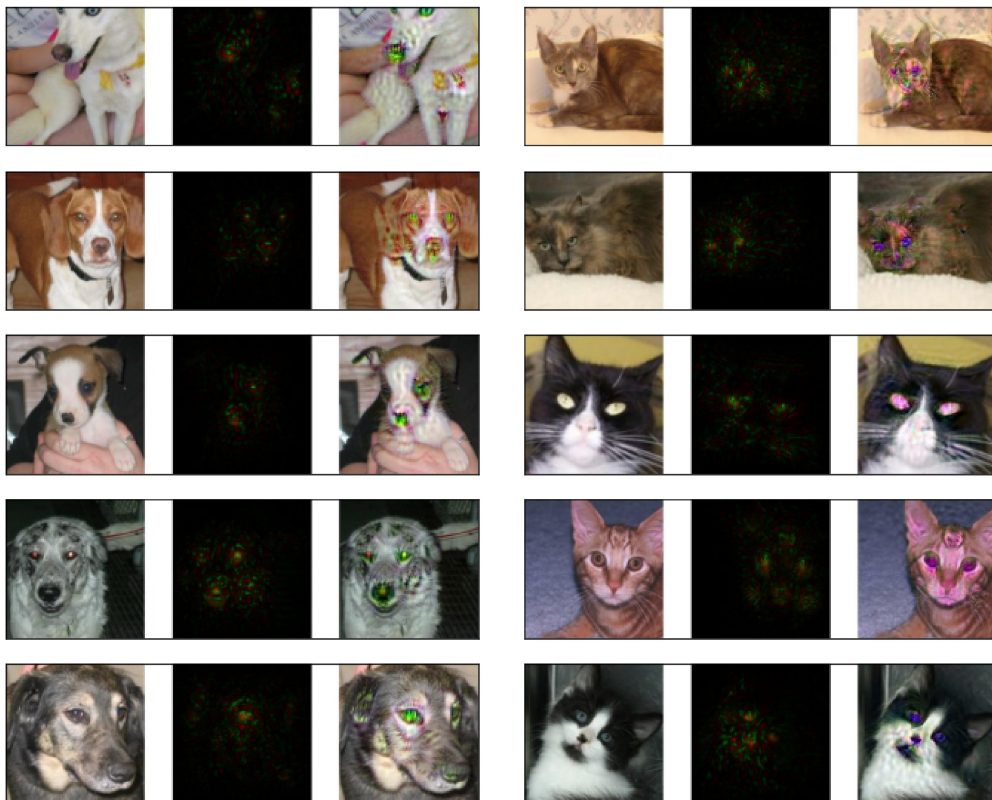

Figure 27: Cat vs Dog Saliency counterfactual samples. Left dog to cat, right cat to dog

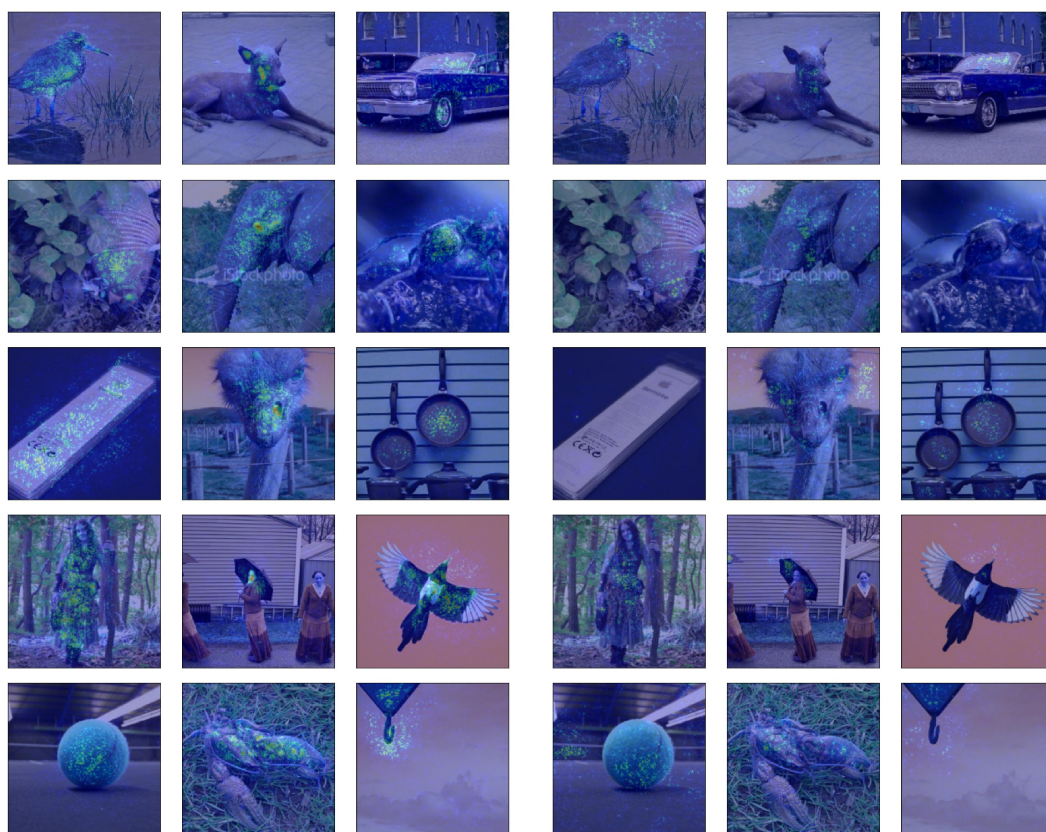

(a) OTNN

(b) Unconstrained

Figure 28: Imagenet Saliency Map samples
